# Supplementary material for: Guidelines for mitochondrial RNA analysis
Source: PubMed Central journal article supplement (PMC11292373; doi:10.1016/j.omtn.2024.102262), 2024-06-26
Supplement: mmc1.pdf [file mmc1.pdf]

## Supplemental information

### Guidelines for mitochondrial RNA analysis

**Amela Jusic, Zoi Erpapazoglou, Louise Torp Dalgaard, Päivi Lakkisto, David de Gonzalo-Calvo, Bettina Benczik, Bence Ágg, Péter Ferdinandy, Katarzyna Fiedorowicz, Blanche Schroen, Antigone Lazou, Yvan Devaux, on behalf of EU-CardioRNA COST Action CA17129, and AtheroNET COST Action CA21153**

**Table S1.** Summary of miRNAs targeting mitochondrial genes.

| miRNA                                        | Origin       | Mitochondrial gene                                          | Reference    |
|----------------------------------------------|--------------|-------------------------------------------------------------|--------------|
| hsa-miR-mit3, hsa-miR-mit6, and hsa-miR-mit4 | Mitochondria | MT-RNR1 (12S rRNA) and MT-RNR2 (16S rRNA)                   | <sup>1</sup> |
| hsa-miR-mit3, hsa-miR-mit3, and hsa-miR-mit4 | Mitochondria | MT-ATP6<br>MT-CO3                                           | <sup>1</sup> |
| mitomiR-2392                                 | Mitochondria | MT-ND2, MT-ND4, MT-ND5, MT-CYB and MT-CO1                   | <sup>2</sup> |
| hsa-miR-338                                  | Nucleus      | COXIV and ATP5G1                                            | <sup>3</sup> |
| hsa-miR-146a                                 | Nucleus      | 16S rRNA, MT-ND1, MT-ND2, MT-ND4, MT-ND5, MT-ND6 and MT-CYB | <sup>4</sup> |
| hsa-miR-26b, hsa-miR-100, and hsa-miR-143    | Nucleus      | MT-CO2                                                      | <sup>5</sup> |
| hsa-miR-181c                                 | Nucleus      | MT-CO1                                                      | <sup>6</sup> |

**Table S2.** FDA-approved RNA-based drugs.

| Therapeutic area | Company           | Candidate             | Modality | Target                                        | Indication                   |
|------------------|-------------------|-----------------------|----------|-----------------------------------------------|------------------------------|
| Cardiovascular   | Anylam + Novartis | Leqvio (Inclisiran)   | RNAi     | Proprotein convertase subtilisin/kexin type 9 | Atherosclerosis              |
|                  | Anylam + Roche    | Zelesbesiran          | RNAi     | Angiotensinogen                               | Hypertension                 |
| Renal            | Anylam            | Oxlumo (Lumasiran)    | RNAi     | Glycolate oxidase                             | Primary hyperoxaluria type I |
| Hepatology       | Anylam            | Gocsiran              | RNAi     | 5'-amino-levulinate synthase 1                | Acute hepatic porphyria      |
| Neuromuscular    | NS Pharma         | Viltepso (Vitolarsen) | ASO      | Dystrophin exon 53                            | Duchene muscular dystrophy   |

|                     |                        |                                                                           |                 |                             |                                     |
|---------------------|------------------------|---------------------------------------------------------------------------|-----------------|-----------------------------|-------------------------------------|
|                     | Serepta                | Exondys 51(eteplirsen)                                                    | PMO             | Dystrophin exon 51          | Duchene muscular dystrophy          |
| Neurology           | Alnylam<br>Ionis + PTC | Onpattro (patirsiran) & Amvuttra (vutrisiran)<br><br>Tegesedi (inotersen) | RNAi<br><br>ASO | Transthyretin               | hATTR Amyloidosis-PN                |
|                     | Biogen + Ionis         | Qaisody (tofersen)                                                        | ASO             | Superoxide dismutase type 1 | SOD-1 Amyotrophic Lateral Sclerosis |
| Infectious diseases | Moderna                | Spikevax (mRNA-1273)                                                      | mRNA            |                             | Covid-19 vaccine                    |
|                     | Pfizer +BioNTech       | Comirnaty                                                                 | mRNA            |                             | Covid-19 vaccine                    |

## References

1. Shinde, S., and Bhadra, U. (2015). A Complex Genome-MicroRNA Interplay in Human Mitochondria. *BioMed Research International* 2015, 1–13.
2. Fan, S., Tian, T., Chen, W., Lv, X., Lei, X., Zhang, H., Sun, S., Cai, L., Pan, G., He, L., et al. (2019). Mitochondrial miRNA Determines Chemoresistance by Reprogramming Metabolism and Regulating Mitochondrial Transcription. *Cancer Research* 79, 1069–1084.
3. Bandiera, S., Matégot, R., Girard, M., Demongeot, J., and Henrion-Caude, A. (2013). MitomiRs delineating the intracellular localization of microRNAs at mitochondria. *Free Radic Biol Med* 64, 12–19.
4. Dasgupta, N., Peng, Y., Tan, Z., Ciruolo, G., Wang, D., and Li, R. (2015). miRNAs in mtDNA-less cell mitochondria. *Cell Death Discovery* 1, 15004.
5. Ferraz, R.S., Santos, L.C.B., da-Silva-Cruz, R.L., Braga-da-Silva, C.H., Magalhães, L., Ribeiro-Dos-Santos, A., Vidal, A., Vinasco-Sandoval, T., Reis-das-Mercês, L., Sena-Dos-Santos, C., et al. (2022). Global miRNA expression reveals novel nuclear

and mitochondrial interactions in Type 1 diabetes mellitus. *Front Endocrinol* *13*, 1033809.

6. Das, S., Ferlito, M., Kent, O.A., Fox-Talbot, K., Wang, R., Liu, D., Raghavachari, N., Yang, Y., Wheelan, S.J., Murphy, E., et al. (2012). Nuclear miRNA Regulates the Mitochondrial Genome in the Heart. *Circ Res* *110*, 1596–1603.
